# Supplementary material for: Gadolinium-doped carbon dots with high-performance in dual-modal molecular imaging
Source: Royal Society of Chemistry journal article supplement (doi:10.1039/d1ay00270h), 2021-01-01
Supplement: d1ay00270h1.pdf [file d1ay00270h1.pdf]

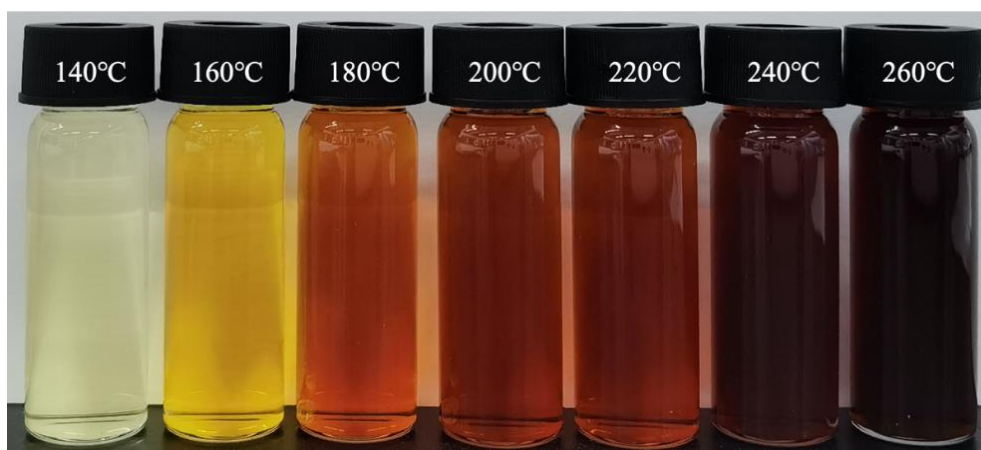

**Fig. S1** The color of Gd-CDs aqueous solutions after different hydrothermal treated conditions.

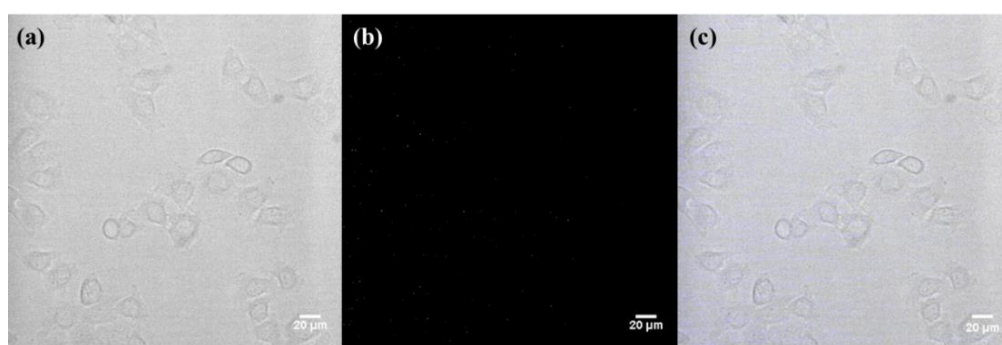

**Fig. S2** (a) Bright-field microphotograph; (b) Wide-field optical microphotograph; (c) Overlap of corresponding bright-field image and FL image of HeLa cells incubated without Gd-CDs.

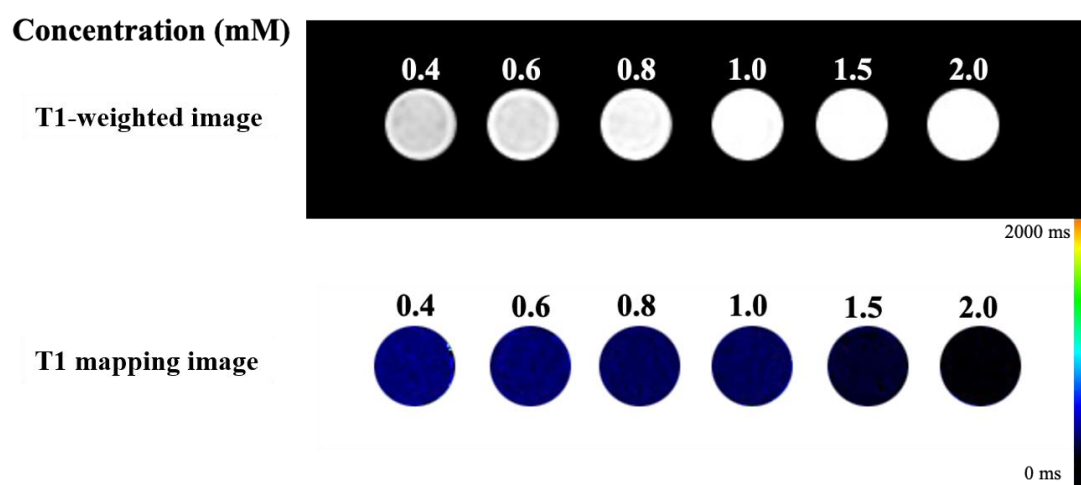

**Fig. S3** T1-weighted and T1 mapping MR images of Gd-DTPA at different  $\text{Gd}^{3+}$  concentrations.

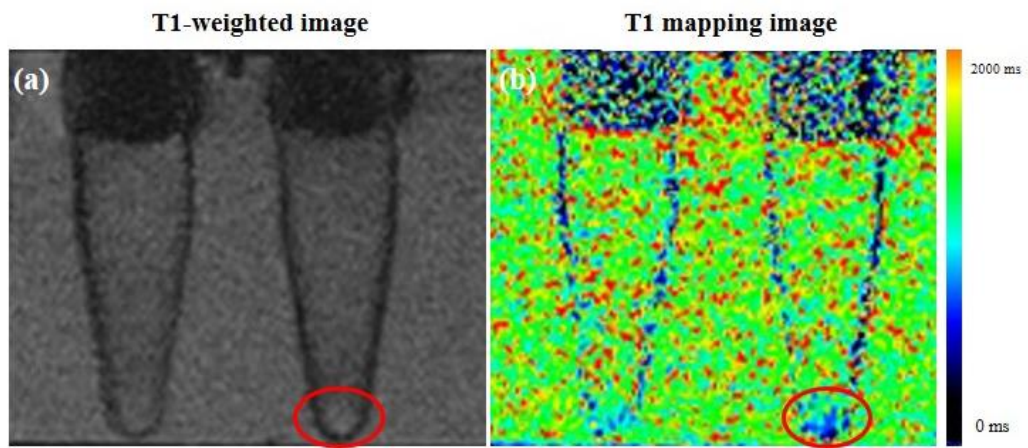

**Fig. S4** T1-weighted (a) and T1 mapping (b) MR images of HeLa cells labelled (right) or unlabelled (left) with Gd-CDs.

---
